# Supplementary material for: Novel GATA1 Variant Causing a Bleeding Phenotype Associated with Combined Platelet α-/δ-Storage Pool Deficiency and Mild Dyserythropoiesis Modified by a SLC4A1 Variant
Source: MDPI journal article supplement (doi:10.3390/cells11193071), 2022-09-29
Supplement: s1 [file s1]

# Supplementary Material

|                                                       |   |
|-------------------------------------------------------|---|
| Supplemental Methods.....                             | 2 |
| Exome Sequencing.....                                 | 2 |
| X-Inactivation Analysis.....                          | 3 |
| mRNA Sequencing .....                                 | 4 |
| ddPCR.....                                            | 4 |
| Supplemental Results .....                            | 5 |
| Blood count of additional family members .....        | 5 |
| Pyrosequencing of GATA1 c.886A>C p.(Thr296Pro) .....  | 6 |
| Sanger sequencing SLC4A1 c.2210C>T p.(Ala737Val)..... | 7 |
| Surface presentation of major platelet receptors..... | 8 |
| mRNA profiling results .....                          | 9 |

## Supplementary Methods

### Exome Sequencing

Coagulation disorder panel (322 genes):

- ABCA1, A2M, ABCG5, ABCG8, ACVRL1, ADAMTS13, ADCY3, ADCY6, ADCY7, ADORA2B, ADRA2A, AKT1, ALOX12, ANKRD26, ANO6, ANXA2, ANXA3, ANXA5, AP3B1, AP3D1, AP3M1, AP3S1, ARHGAP1, ARHGAP17, ARHGAP32, ARHGAP6, ARHGDIA, ARHGDIB, ARHGEF12, ARRB1, B4GALNT2, BLOC1S1, BLOC1S2, BLOC1S3, BLOC1S4, BLOC1S5, BLOC1S6, BTK, C1QA, C4BPA, C4BPB, CD177, CD36, CFH, CFI, CHST14, CLEC1B, COL1A1, CPB2, CSK, CTTN, CYCS, DAAM1, DIAPH1, DIAPH2, DNMT2, DTNBP1, EFN1, ENG, ENTPD1, EPHA4, EPHB1, F10, F11, F12, F13A1, F13B, F2, F2R, F2RL3, F3, F5, F7, F8, F9, FARP2, FCGR2A, FERMT1, FERMT3, FGA, FGB, FGD3, FGG, FGR, FHOD1, FLI1, FLNA, FN1, FYN, GATA1, GDI2, GFI1B, GGCX, GNA12, GNA13, GNAI1, GNAI2, GNAQ, GNAZ, GNB2, GNB3, GNG11, GNG12, GNG13, GNG5, GP1BA, GP1BB, GP5, GP6, GP9, GRAP2, GRB2, GRK2, GRK5, GRK6, GUCY1A3, GUCY1B3, HOXA11, HPS1, HPS3, HPS4, HPS5, HPS6, HRG, HTR2A, INPP5D, ITGA2, ITGA2B, ITGA5, ITGB1, ITGB3, ITPR1, JAK2, KLKB1, KNG1, LAIR1, LAT, LCP2, LEFTY2, LMAN1, LTBP1, LY6G6F, LYN, LYST, MAPK1, MAPK13, MAPK14, MAPK8, MASTL, MCFD2, MLPH, MMRN1, MMRN2, MPL, MTHFR, MYH9, MYLK, MYLK2, MYO5A, NAPA, NAPG, NBEA, NBEAL2, NIPSNAP3A, NSF, ORAI1, P2RX1, P2RY1, P2RY12, PAFAH1B1, PDE2A, PDE3A, PDE4D, PDE5A, PDGFA, PDGFB, PDGFC, PDGFD, PDGFRA, PDGFRB, PDPK1, PEAR1, PF4, PIK3CA, PIK3CB, PIK3CD, PIK3CG, PIK3R1, PIK3R3, PIK3R5, PLA2G2A, PLA2G4A, PLA2G4C, PLA2G7, PLAT, PLAU, PLAUR, PLCB2, PLCB3, PLCG2, PLG, PPP1CA, PPP1CB, PPP1CC, PPP1R12A, PPP1R12C, PPP1R14A, PPP1R2, PRKACA, PRKACB, PRKACG, PRKAR1A, PRKAR2A, PRKCA, PRKCB, PRKCD, PRKCQ, PRKD1, PRKG1, PRKG2, PROC, PROCR, PROS1, PROZ, PTEN, PTGIR, PTGS1, PTGS2, PTK2, PTPN11, PTPN6, PTPRA, PTPRJ, RAB27A, RAB27B, RAB38, RAB4A, RABGGTA, RAC1, RAP1GAP, RAP1GAP2, RAP1GDS1, RASGRP2, RBM8A, RGS10, RGS18, RGS19, RGS20, RGS9, RHOA, RHOC, RHOF, ROCK1, ROCK2, RUNX1, SCAMP2, SCFD1, SELP, SEPT5, SERPINA1, SERPINA10, SERPINA2, SERPINA5, SERPINC1, SERPIND1, SERPINE1, SERPINE2, SLC35D3, SLC9A3R1, SMAD4, SNAP23, SNAP25, SNAP29, SNAPIN, SNX1, SRC, STIM1, STOM, STX11, STX12, STX2, STX4, STX6, STX7, STXBP3, SYK, SYTL4, TBXA2R, TBXA51, TEC, TET2, TFPI, TFPI2, TGFB1, TGFB3, THBD, THPO, TLN1, TLR2, TREML1, TTC37, TUBB1, UNC13A, VAMP2, VAMP3, VAMP7, VAMP8, VAV1, VAV2, VAV3, VKORC1, VPS11, VPS16, VPS18, VPS33A, VPS33B, VPS39, VPS41, VWF, WAS, WIPF1, WIPF2, WIPF3

Anemia panel (96 genes):

- ABCG5, ABCG8, ADA, AK1, ALDOA, ANK1, BLVRB, BRCA2, BRIP1, CYB5A, CYB5R3, DKC1, EPB41, EPB42, ERCC4, FANCA, FANCB, FANCC, FANCD2, FANCE, FANCF, FANCG, FANCI, FANCL, FANCM, G6PD, GAPDH, GATA1, GCLC, GOT1, GPI, GSR, GSS, HAMP, HBA1, HBA2, HBB, HBD, HBE1, HBG1, HBG2, HBZ, HFE, HJV, HK1, NHP2, NOP10, NT5C3A, PALB2, PARN, PFKL, PFKM, PGD, PGK1, PIEZO1, PKLR, RAD51C, RPL11, RPL15, RPL26, RPL27, RPL31, RPL35A, RPL5, RPS10, RPS17, RPS19, RPS24, RPS26, RPS27, RPS28, RPS29, RPS7, RTEL1, SBDS, SLC11A2, SLC40A1, SLC4A1, SLCO1B1, SLCO1B3, SLX4, SPTA1, SPTB, STEAP3, TERC, TERT, TFR2, TINF2, TMPRSS6, TP11, TSR2, UGT1A1, UGT1A6, , UGT1A7, UROS, WRAP53

Platelet proteomic analysis of index patient (46 genes):

- QSOX1, PPP6C, TMCC2, HSPA4L, FTH1, CSTB, PRNP, LPL, SERPINE2, ENO2, LGALS1, P4HA1, ST6GAL1, ITGB5, MAOB, CTGF, ALDH4A1, GRK6, GSTM5, CXCL12, SELENOP, SULT1A1, PPT1, SLC12A2, STXBP1, SELENOT, MAP1A, FHL2, SEC23B, FNBP1L, STEAP3, CD109, RINL, ERO1B, TDRP, C2CD5, DOCK10, RARRES2, P2RY12, FN3K, PLXNA4, DECR2, SPHK1, CEP131, WASF3, MRVI1

**Table S1.** Primers used to confirm whole exome sequencing results and screen additional family members via Sanger sequencing.

| Gene   | Exon | Forward Primer<br>(5'-3')                            | Reverse Primer<br>(5'-3')                          | Prod.<br>Length<br>[bp] | Tm [°C]       |
|--------|------|------------------------------------------------------|----------------------------------------------------|-------------------------|---------------|
| EPHB1  | 10   | <i>GTAAAACGACGGCCAGATGAGGA</i><br>GGCCCAGCAAGAG      | <i>CAGGAAACAGCTATGACAGGGTGG</i><br>TGGAAAGAAGATGTT | 348                     | 63.0/<br>60.0 |
| AP3B1  | 10   | <i>GTAAAACGACGGCCAAGTGCTTAC</i><br>TCAAAGATGTTTCATTG | <i>CAGGAAACAGCTATGACGGTTCAA</i><br>ACATCCCCTGGATTA | 217                     | 57.3/<br>60.9 |
| SLC4A1 | 17   | AGGAGGCAGGGGAGAACC                                   | ATGTGGGGAAGTGGTGCA                                 | 429                     | 60.5/<br>60.0 |

*Italic* = M13 sequencing tag.

**Table S2.** Primers used to confirm whole exome sequencing results and screen additional family members via pyrosequencing.

| Gene  | Exon | Forward Primer<br>(5'-3')     | Reverse Primer<br>(5'-3')  | Sequencing Primer (5'-3') | Prod.<br>Length<br>PCR [bp] | Tm [°C]       |
|-------|------|-------------------------------|----------------------------|---------------------------|-----------------------------|---------------|
| GATA1 | 6    | Bio-TTGACACAGAGA<br>GGCAAAGGT | TTCTTTTCCCTTTTCC<br>AGATGC | CATCCTTCCGCATGG           | 135                         | 58.8/<br>61.6 |

Bio = 5' biotinylated primer.

#### *X-Inactivation Analysis*

**Table S3.** Primers used for pyrosequencing of X-chromosomal polymorphisms and GATA1 pathogenic variant.

| Gene (type)     | Exon | Forward Primer<br>(5'-3')     | Reverse Primer<br>(5'-3')      | Sequencing Primer<br>(5'-3') | Prod. Length<br>PCR [bp] | Tm [°C]       |
|-----------------|------|-------------------------------|--------------------------------|------------------------------|--------------------------|---------------|
| GATA1<br>(gDNA) | 6    | Bio-TTGACACAGAGA<br>GGCAAAGGT | TTCTTTTCCCTTTTCC               | CATCCTTCCGCATG               | 135                      | 58.8/<br>61.6 |
| GATA1<br>(cDNA) | 6    | Bio-TGCGGCCTCTACT<br>ACAAGCT  | CAGATGC                        | G                            | 104                      | 59.1/<br>61.6 |
| ELF4 (gDNA)     | 12   | TCAGTGGCCTCCCC<br>AAC         | Bio-TGAAGGCAGCA                | AACCCGGCGCCAC                | 126                      | 63.5/<br>62.6 |
| ELF4 (cDNA)     | 12   | TACCTCCACCATGCTC<br>GTCTCT    | ATGACAGTCC                     | CC                           | 446                      | 62.3/<br>62.6 |
| PRPS2<br>(gDNA) | 1    | CTGTTTCAGCGGCAGC              | Bio-CTGGTCTCCTGG<br>TTGCTGAACT | AGCTCGCATCAGG                | 107                      | 63.5/<br>61.9 |
| PRPS2<br>(cDNA) | 1    | TCG                           | Bio-TCGGGCGTATGG<br>GAAACAC    | AC                           | 273                      | 63.5/<br>63.0 |

Bio = 5' biotinylated primer.

*mRNA Sequencing*

List of GATA1-regulated genes, used to filter mRNA profiling data (49 genes):

- ACKR1, AHSP, AIFM2, ALAD, ALAS2, ANK1, AQP1, ARG1, ART4, BCAM, BSG, CD44, EKLF, ELANE, EPB42, EPOR, ERAP1, ERMAP, FCER1A, FOG1, G6PD, GATA1, GYPA, HBA1, HBA2, HBB, HBE1, HBG2, HLA-A, HLA-B, HLA-DPB1, HLA-DRA, HLA-DRB1, HLA-DRB4, HLA-G, IL4R, KLF1, MPO, NCF4, NFE2, PKLR, RNASE2, RNASE3, SLC4A1, TMOD1, TPSAB1, TPSB1, TPSB2, UROD

*ddPCR*

**Table S4.** Primers used for ddPCR analyses of whole blood mRNA.

| Gene   | Exon  | Forward Primer<br>(5'-3')       | Reverse Primer<br>(5'-3')       | Prod.<br>Length [bp] | Tm [°C]       |
|--------|-------|---------------------------------|---------------------------------|----------------------|---------------|
| SLC4A1 | 7–8   | CAACACTCCTCACTGGAGACAC          | GAATTCCAGATGGTGAGTGCC           | 79                   | 58.8/<br>60.7 |
| ANK1   | 28–29 | CAACGTTCCCGGAGAATG              | TTGCCCAGGAGCTTAGTGAC            | 94                   | 59.0/<br>59.3 |
| TMCC2  | 3–4   | CAGAGGGACTACAC-<br>CTACATGAC    | CAGTCAGGTCGTTGAGCTG             | 88                   | 56.6/ 57.1    |
| KLF1   | 2–3   | GGTTGCGGCAAGAGCTAC              | GTGCAGGCGTATGGCTTC              | 83                   | 58.5/ 59.4    |
| AHSP   | 2–3   | TCCGCAGGATTGAAGGAG              | CACCACAGTCACCATGTCTTC           | 90                   | 58.9/ 58.0    |
| GATA1  | 2–3   | TACTACAGGGACGCTGAGGC            | AGCCGGCATATGGTGAGC              | 103                  | 59.3/ 61.1    |
| SDHB   | 7–8   | ATACCGCTGCCACACCATC             | TGAA-<br>GCTTTCTTCTCCTTATAGGTTG | 118                  | 60.9/ 59.3    |
| MRPL9  | 4–5   | GAGAAGATCCAGACCAAGGC            | GGTTCAGCTCCCATTGAC              | 100                  | 57.8/ 57.0    |
| CXCL12 | 1–2   | ATGAACGCCAAGGTCGTG              | GGCATGGGCATCTGTAGC              | 97                   | 59.7/ 59.2    |
| DOCK10 | 52–53 | CTGTCGGGCAAGAAGCAC              | TCTTCACGTAGGGGAACAGG            | 88                   | 59.6/ 59.0    |
| ENO2   | 2–3   | CTGAGGGATGGAGACAAACAG           | CGCGATGGTGAGTTGAT               | 78                   | 58.6/ 59.7    |
| HBG1/2 | 1–2   | GATGCTGGAGGAGAAACCC             | CAGGTTGCCAAAGCTGTCA             | 81                   | 58.6/ 60.0    |
| HBB    | 1–2   | CTGAGGA-<br>GAAGTCTGCCGTTACT    | CAAGGGTAGACCACCAGCAG            | 97                   | 60.1/<br>59.6 |
| HBA1/2 | 1–3   | GCTGTCTCCTGCCGACAA              | GTCGAAGTGCGGGAAGTAGG            | 139                  | 60.2/<br>61.0 |
| LGALS1 | 3–4   | CTGTCTTTCCCTTCCAGCC             | GTATCCATCTGGCAGCTTGAC           | 89                   | 58.7/ 58.6    |
| H3.3A  | 4–5   | GTGCGAGAAATTGCTCAGGAC           | TCAAAAAGGCCAACCAGA-<br>TAGG     | 104                  | 59.9/ 58.6    |
| ACTB   | 4     | CTGACTGACTACCTCATGAA-<br>GATCCT | CTTAATGTCACGCACGATTTC           | 87                   | 60.2/<br>60.6 |

## Supplementary Results

*Blood count of additional family members***Table S5.** Blood count of the father, mother and son 1. The reference values are given in brackets.

|                             | Father (M, 59)      | Mother (F, 58)         | Son1 (M, 7)            | Unit                      |
|-----------------------------|---------------------|------------------------|------------------------|---------------------------|
| White blood cell count      | 6.9 (3.5–10)        | 7.1 (3.5–10)           | 9.01 (4.5–13.0)        | $\times 10^3/\mu\text{L}$ |
| Red blood cell count        | 4.90 (4.3 - 6.3)    | 3.99 (3.7–4.8)         | 4.68 (3.7–5.8)         | $\times 10^6/\mu\text{L}$ |
| Hemoglobin                  | 15.1 (13.5–17.5)    | 13.0 (12.0–16.0)       | 12.8 (10.0–15.0)       | g/dL                      |
| Hematocrit                  | 47.3 (39–49)        | 41.9 (34–44)           | <b>36.3</b> (39–49)    | %                         |
| Mean corpuscular volume     | 95.7 (83–100)       | <b>+105.0</b> (83–100) | <b>−77.6</b> (83–100)  | fL                        |
| Mean corpuscular hemoglobin | 30.6 (27–33)        | 32.6 (27–33)           | 27.4 (27–33)           | pg                        |
| MCHC                        | <b>31.9</b> (32–35) | <b>31.0</b> (32–35)    | <b>35.3</b> (32–35)    | g/dL                      |
| Platelets                   | 269.0 (150–360)     | 207.0 (150–360)        | <b>414.0</b> (150–360) | $\times 10^3/\mu\text{L}$ |
| Lymphocytes                 | 37.5 (16–45)        | 42.4 (16–45)           | 41.0 (16–45)           | %                         |
| Neutrophils                 | -                   | -                      | 48.0 (43–75)           | %                         |
| RWD_CV                      | 12.9 (11.0–15.0)    | 14.2 (11.0–15.0)       | 13.1 (11.0–15.0)       | %                         |
| PDW                         | 11.5                | 14.5                   | -                      | fL                        |
| Mean platelet volume        | 9.3 (7.6–11.2)      | 11.3 (7.6–11.2)        | 9.8 (7.6–11.2)         | fL                        |
| Platelet-large cell ratio   | 20.8                | 34.5                   | -                      | %                         |
| Hemo-globin<br>HPLC         | HbF                 | 0.9 (<1)               | 0.7 (<1)               | <b>+1.6</b> (<1)          |
|                             | HbA2                | 2.4 (<3.3)             | 2.6 (<3.3)             | 3.0 (<3.3)                |
|                             | Variant hemoglobin  | none                   | none                   | none                      |

MCHC = mean corpuscular hemoglobin concentration; RWD\_CV = variation coefficient of red cell distribution width; PDW= platelet distribution width; bold = values outside reference range.

Pyrosequencing of *GATA1* c.886A>C p.(Thr296Pro)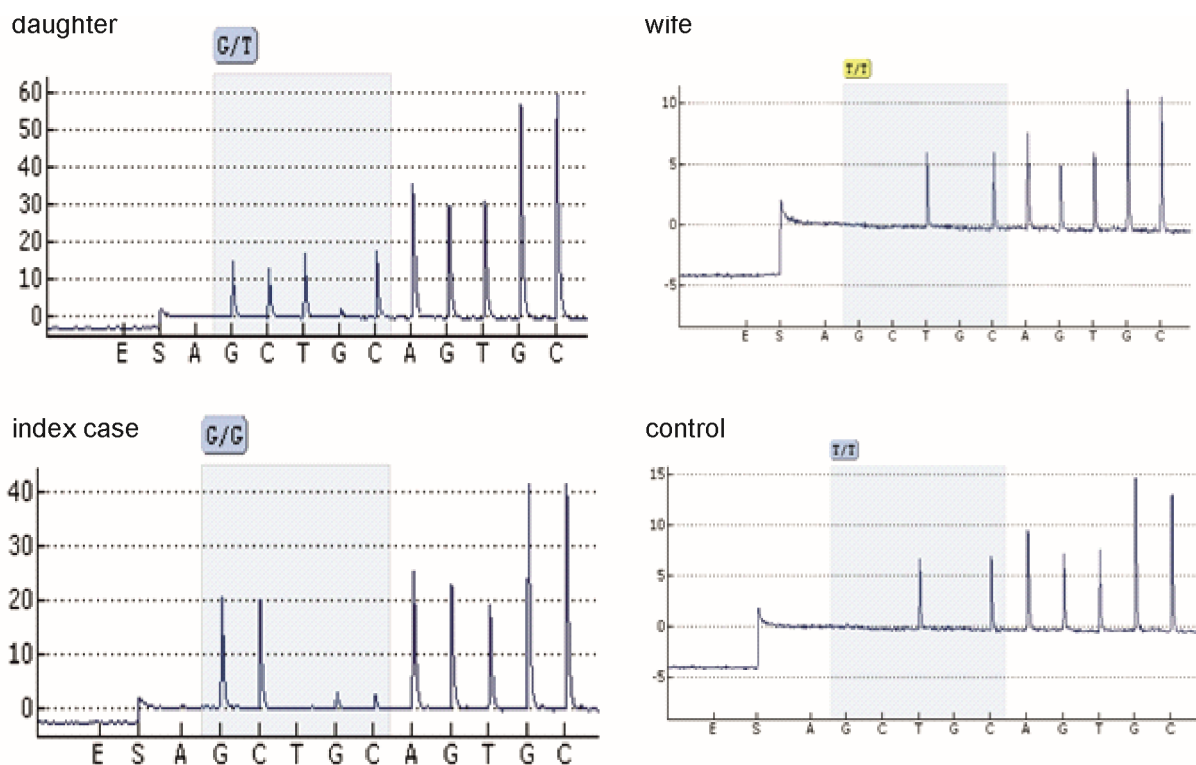

**Figure S1.** Pyrograms of *GATA1* c.886A>C p.(Thr296Pro) (exon 6, NM\_002049.4). The assay uses the reverse strand, therefore, the exchange is T > G here. The daughter is heterozygous for *GATA1* c.886A>C p.(Thr296Pro), the index case is hemizygous, and the control and wife both do not carry the exchange.

Sanger sequencing *SLC4A1* c.2210C>T p.(Ala737Val)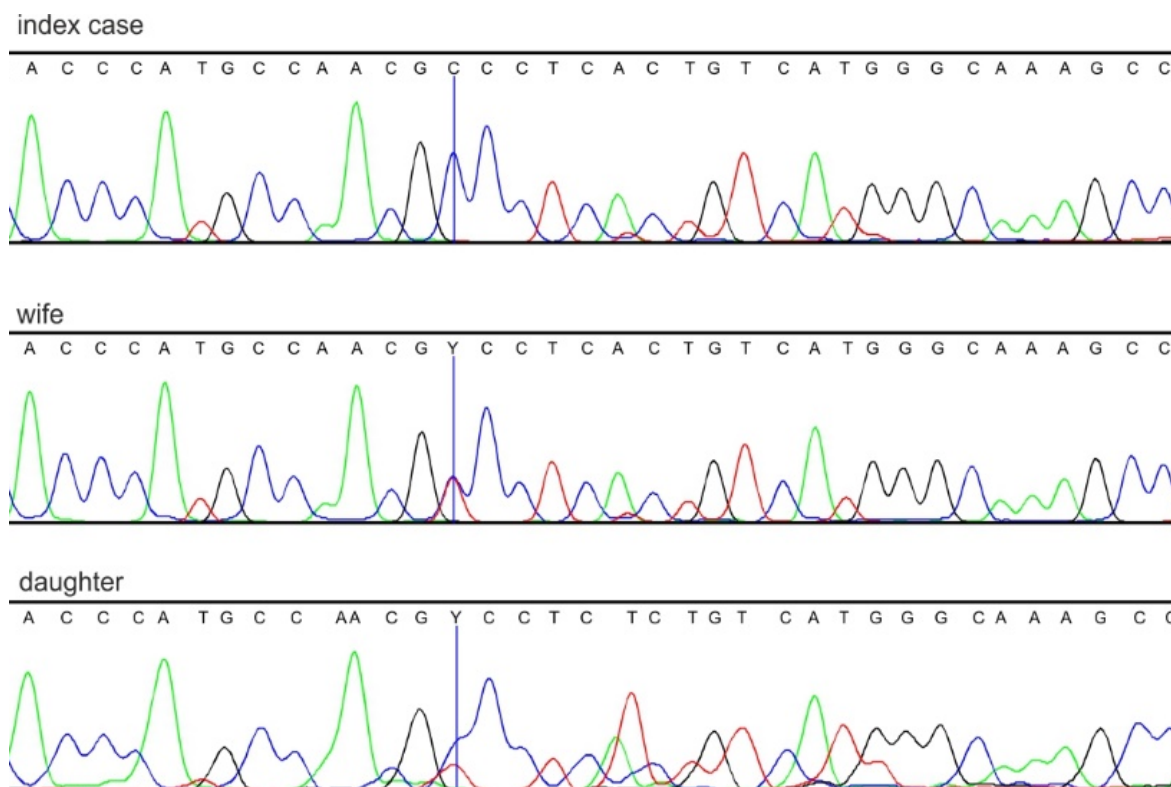

**Figure S2.** Electropherograms of *SLC4A1* c.2210C>T p.(Ala737Val) (exon 17, NM\_000342.4) of the index case, his wife and daughter (blue vertical line = base exchange). The index case (upper panel), his mother, father and son 1 do not carry the variant. His wife (middle panel), son 2, son 3 and daughter (lower panel) are all heterozygous for *SLC4A1* c.2210C>T p.(Ala737Val). Y = T or C.

*Surface presentation of major platelet receptors*

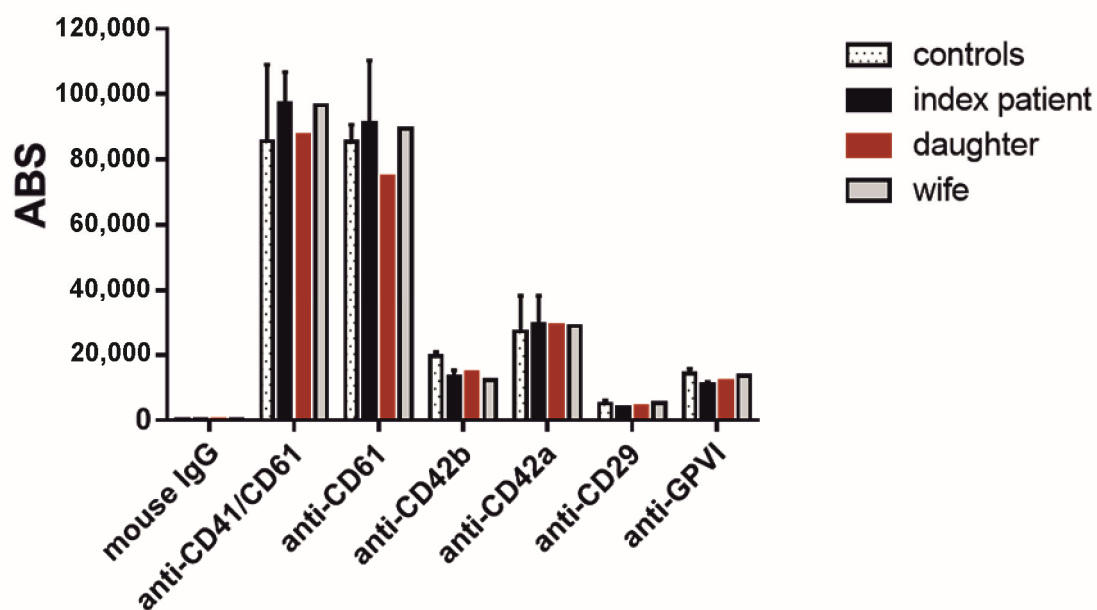

**Figure S3.** Flow cytometric analysis of major platelet surface receptors from GATA1 index patient, affected daughter, unaffected wife and additional healthy controls. Antigen binding sites (ABS) of anti-GPIIb/IIIa (CD41/CD61), anti-GPIX (CD42a), anti-GPIb $\alpha$  (CD42b), anti-integrin- $\beta$ 1 (CD29) and anti-GPVI antibodies compared to unspecific mouse IgG on platelets in diluted citrated whole blood. Index patient ( $n = 2$ ), daughter, wife ( $n = 1$ ), controls (30 different individuals).



*mRNA profiling results***Table S6.** Transcripts significantly differentially expressed in index case or daughter (overlapping transcripts are highlighted in grey).

| Daughter All Significant Transcripts | Transcript ID   | Index Case All Significant Transcripts | Transcript ID   |
|--------------------------------------|-----------------|----------------------------------------|-----------------|
| ACHE                                 | ENST00000302913 | ACHE                                   | ENST00000302913 |
| ACHE                                 | ENST00000411582 | AHSP                                   | ENST00000569954 |
| AGPAT1                               | ENST00000336984 | ANK1                                   | ENST00000347528 |
| AHSP                                 | ENST00000569954 | BLVRB                                  | ENST00000263368 |
| ANK1                                 | ENST00000347528 | BPGM                                   | ENST00000344924 |
| BAG1                                 | ENST00000379704 | BTNL3                                  | ENST00000342868 |
| BLVRB                                | ENST00000263368 | CHPT1                                  | ENST00000229266 |
| BPGM                                 | ENST00000344924 | CREG1                                  | ENST00000370509 |
| BTNL3                                | ENST00000342868 | CRISP2                                 | ENST00000616725 |
| CRISP2                               | ENST00000616725 | DCAF12                                 | ENST00000361264 |
| CTAG2                                | ENST00000247306 | DDX3Y                                  | ENST00000336079 |
| CTC-490G23.2                         | ENST00000595748 | E2F2                                   | ENST00000361729 |
| CYP26B1                              | ENST00000412253 | EIF1AY                                 | ENST00000361365 |
| DCAF12                               | ENST00000361264 | EIF1AY                                 | ENST00000382772 |
| DMTN                                 | ENST00000265800 | FAM210B                                | ENST00000371384 |
| FAM210B                              | ENST00000371384 | FAM3B                                  | ENST00000398646 |
| FAM46C                               | ENST00000369448 | FAM46C                                 | ENST00000369448 |
| FECH                                 | ENST00000382873 | FAM83A                                 | ENST00000276699 |
| GATA1                                | ENST00000376670 | FECH                                   | ENST00000382873 |
| GLRX5                                | ENST00000331334 | FIS1                                   | ENST00000223136 |
| GMPR                                 | ENST00000259727 | FUCA1                                  | ENST00000374479 |
| GSPT1                                | ENST00000563468 | GATA1                                  | ENST00000376670 |
| HBBP1                                | ENST00000433329 | GLRX5                                  | ENST00000331334 |
| HBBP1                                | ENST00000454892 | GMPR                                   | ENST00000259727 |
| HBD                                  | ENST00000380299 | H2AFJ                                  | ENST00000544848 |
| HBQ1                                 | ENST00000199708 | HBBP1                                  | ENST00000433329 |
| HEMGN                                | ENST00000259456 | HBBP1                                  | ENST00000454892 |
| HLA-DQB1                             | ENST00000434651 | HBD                                    | ENST00000380299 |
| HLA-DQB1                             | ENST00000460185 | HBM                                    | ENST00000356815 |
| HLA-F                                | ENST00000489502 | HBQ1                                   | ENST00000199708 |
| IGLC1                                | ENST00000390321 | HIST1H1C                               | ENST00000343677 |
| IGLC3                                | ENST00000390325 | HLA-DQB1                               | ENST00000434651 |
| KLF1                                 | ENST00000264834 | HLA-F                                  | ENST00000489502 |
| KRT1                                 | ENST00000252244 | IGLC3                                  | ENST00000390325 |
| LGALS3                               | ENST00000254301 | KDM5D                                  | ENST00000317961 |
| LILRB2                               | ENST00000493242 | KDM5D                                  | ENST00000382806 |
| LINC01291                            | ENST00000377469 | KDM5D                                  | ENST00000469599 |
| LYL1                                 | ENST00000264824 | KLF1                                   | ENST00000264834 |
| MRC2                                 | ENST00000583597 | LGALS3                                 | ENST00000254301 |
| NAMPTP1                              | ENST00000440465 | LILRB2                                 | ENST00000493242 |
| NPRL3                                | ENST00000620134 | LINC01291                              | ENST00000377469 |
| OR2W3                                | ENST00000360358 | LYL1                                   | ENST00000264824 |
| OSBP2                                | ENST00000535268 | MIR4732                                | ENST00000582320 |

|                 |                 |            |                 |
|-----------------|-----------------|------------|-----------------|
| PDZK1IP1        | ENST00000294338 | MRC2       | ENST00000583597 |
| PPP1R11         | ENST00000376763 | PDZK1IP1   | ENST00000294338 |
| PRDX6           | ENST00000470017 | PPP1R11    | ENST00000376763 |
| PWP2            | ENST00000291576 | PRKY       | ENST00000528056 |
| RP11-734I18.1   | ENST00000513211 | PRRC2A     | ENST00000464890 |
| RPRM            | ENST00000325926 | RNF11      | ENST00000242719 |
| RUNDC3A         | ENST00000588564 | RPRM       | ENST00000325926 |
| SELENBP1        | ENST00000368868 | RPS4Y1     | ENST00000430575 |
| SIAH2           | ENST00000312960 | RPS4Y1     | ENST00000477725 |
| SLC4A1          | ENST00000262418 | SELENBP1   | ENST00000368868 |
| SNCA            | ENST00000508895 | SIAH2      | ENST00000312960 |
| ST6GALNAC4      | ENST00000335791 | ST6GALNAC4 | ENST00000335791 |
| TMCC2           | ENST00000329800 | TESC       | ENST00000335209 |
| TNS1            | ENST00000446688 | TMCC2      | ENST00000329800 |
| TRBV20-1        | ENST00000390394 | TMEM8C     | ENST00000339996 |
| TRIM58          | ENST00000366481 | TNS1       | ENST00000446688 |
| XXyac-YM21GA2.7 | ENST00000399186 | TRIM58     | ENST00000366481 |
|                 |                 | TSKU       | ENST00000333090 |
|                 |                 | TXLNGY     | ENST00000253320 |
|                 |                 | UBE2M      | ENST00000253023 |
|                 |                 | USP9Y      | ENST00000426564 |
|                 |                 | USP9Y      | ENST00000471409 |
|                 |                 | ZFY        | ENST00000155093 |
